# Supplementary figures and images for: Preparation of a hydrophilic nanofiber membrane by electrospinning for application in the detection of NO2 by chemiluminescence
Source: Royal Society of Chemistry journal article supplement (doi:10.1039/d3ay00936j), 2023-01-01

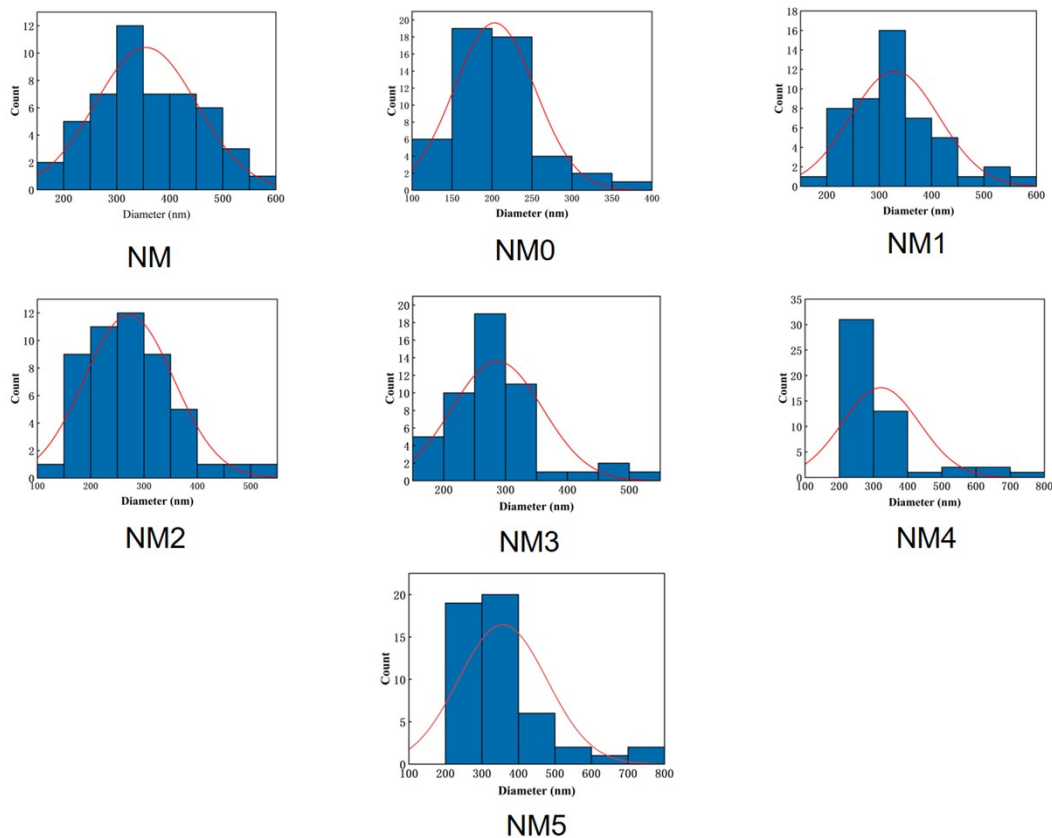

Fig.1 Supplementary information for a clearer figure of fiber diameter distribution

Supplement: d3ay00936j1.pdf [file d3ay00936j1.pdf]
